# Supplementary material for: Overexpression of OsGF14f Enhances Quantitative Leaf Blast and Bacterial Blight Resistance in Rice
Source: MDPI journal article supplement (doi:10.3390/ijms23137440), 2022-07-04
Supplement: s1 [file s1]

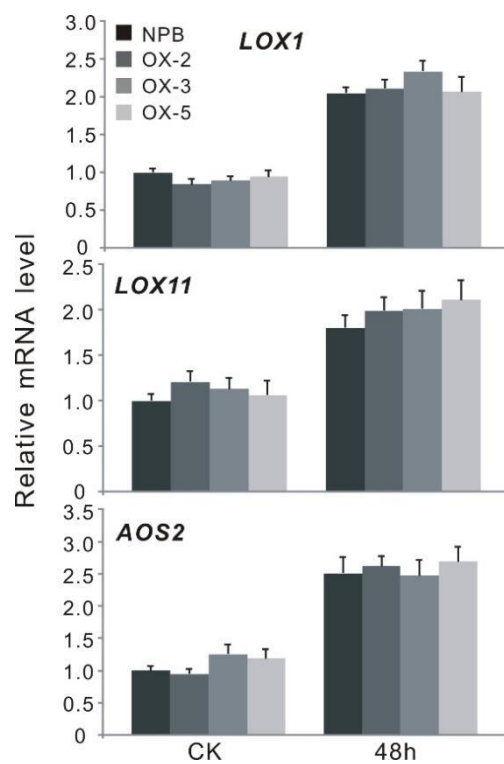

**Figure S1.** The expression patterns of three defense-related genes involved in jasmonic acid (JA)-dependent pathway before blast infection (CK) and at 48 h after infection with *M. oryzae*.

**Table S1.** Primers used for vector construction and Quantitative RT-PCR.

| Gene         | Forward primer (5'-3')   | Reverse primer (5'-3')     |
|--------------|--------------------------|----------------------------|
| GF14f-OE     | ACAAGGTCAGACTAAGTTTGCG   | TGACATACGCAGCCCTAATCTT     |
| LOX1         | GGTGCAGCACCATCGAGCAG     | TACGTGTCCTGCTTCATCGTCC     |
| LOX11        | CGACCAAGAACAGACGACCGA    | TGCCATCCATGTGCGAGTACCT     |
| AOS2         | CAATACGTGTACTGGTCTGAATGG | AAGGTGTCTGTACCGGAGGAA      |
| PR10         | CCCTGCCGAATACGCCTAA      | CTCAAACGCCACGAGAATTTG      |
| NH1          | CACGCCTAAGCCTCGGATTA     | TCAGTGAGCAGCATCCTGACTAG    |
| PAL1         | AGCACATCTTGGAGGGAAGCT    | GCGCGGATAACCTCAATTTG       |
| PR1a         | CGTCTTCATCACCTGCAACTACTC | CATGCATAAACACGTAGCATAGCA   |
| GF14f        | ACAAGGTCAGACTAAGTTTGCGTT | GAATTCGACCATTTCTCGTAAC     |
| EF1 $\alpha$ | TTTCACTCTTGGTGTGAAGCAGAT | GACTTCCTTCACGATTTTCATCGTAA |

**Table S2.** Characteristic fragment ions of the SA standard and its optimized MS/MS conditions.

| Analyte | ESI mode | Transition1      |                     |                           | Transition2      |                     |                           |
|---------|----------|------------------|---------------------|---------------------------|------------------|---------------------|---------------------------|
|         |          | Quantitative ion | Collision energy/ev | Declustering potential/ev | Quantitative ion | Collision energy/ev | Declustering potential/ev |
| SA      | ESI-     | 136.9>65.0       | -40                 | -40                       | 136.9>92.8       | -32                 | -40                       |
